# Supplementary material for: Optoelectronic conversion and polarization hysteresis in organic MISM and MISIM devices with DA-type single-component molecules
Source: Royal Society of Chemistry journal article supplement (doi:10.1039/d3fd00125c), 2023-09-04
Supplement: d3fd00125c1.pdf [file d3fd00125c1.pdf]

## Supporting Information

### **Optoelectronic conversion and polarization hysteresis in organic MISM and MISIM devices with DA-type single component molecules**

Akihiro Tomimatsu,<sup>a</sup> Rie Suizu,<sup>a,b</sup> Miyabi Nakazawa,<sup>c</sup> Takashi Shirahata,<sup>c,d</sup> Yohji Misaki,<sup>c,d</sup> Naoya Kinoshita,<sup>a</sup> and Kunio Awaga <sup>\*a</sup>

<sup>a</sup> Department of Chemistry & Integrated Research Consortium on Chemical Sciences (IRCCS), Nagoya University, Furo-cho, Chikusa-ku, Nagoya 464-8602, Japan.

<sup>b</sup> Japan Science and Technology Agency (JST), PRESTO, 4-1-8 Honcho, Kawaguchi, Saitama 332-0012, Japan

<sup>c</sup> Department of Applied Chemistry, Graduate School of Science and Engineering, Ehime University, Matsuyama, 790-8577, Japan

<sup>d</sup> Research Unit for Materials Development for Efficient Utilization and Storage of Energy, Ehime University, 790-8577, Japan

S1. NMR

S2. Thin film XRD measurements

S3. Details of PUND method and ferroelectric displacement current

## S1. NMR spectra

$^1\text{H}$  NMR spectra were recorded on a Bruker Biospin AVANCE 400 spectrometers using  $\text{CS}_2/\text{C}_6\text{D}_6$  solvent. The chemical shifts were referenced to tetramethylsilane.

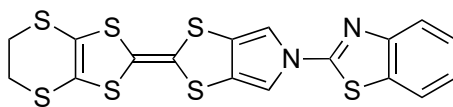

ET-PRBT

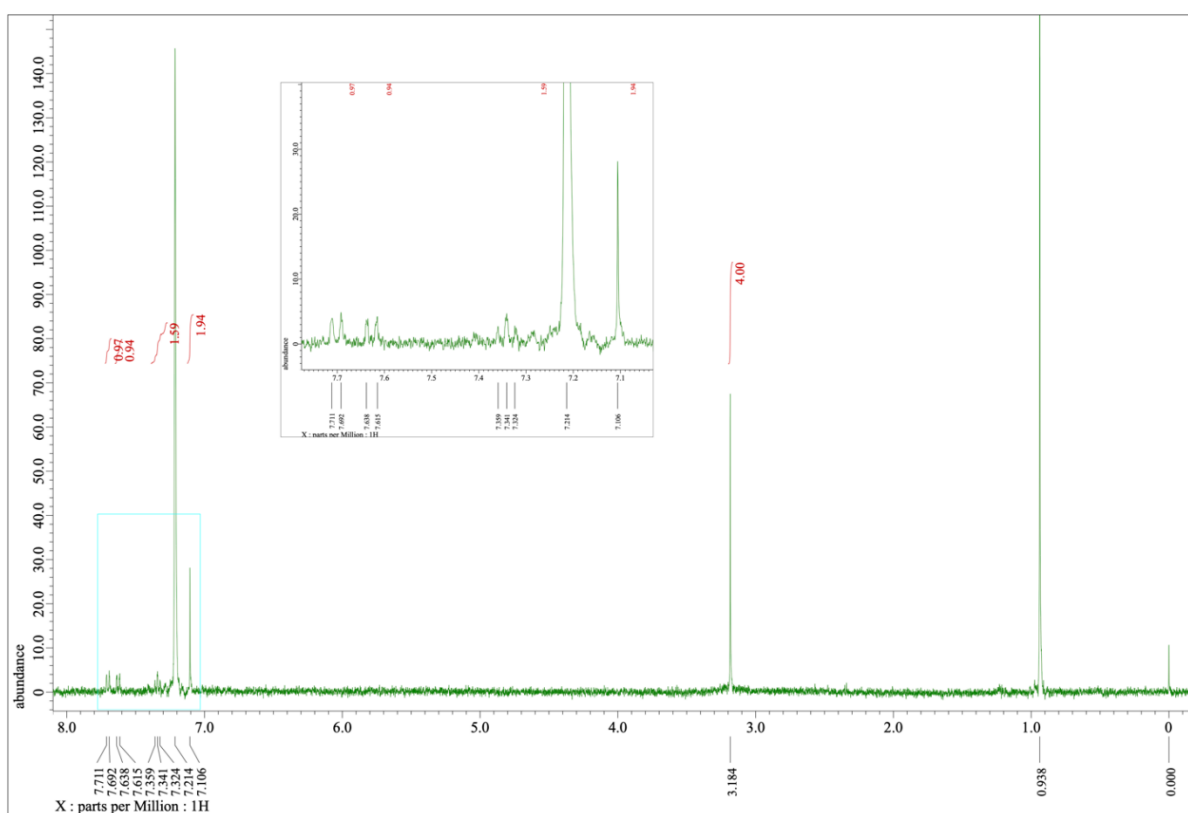

$^1\text{H}$  NMR (400 MHz,  $\text{CS}_2/\text{C}_6\text{D}_6$ , 25 °C, TMS)  $\delta$  3.18 (s, 4H), 7.11 (s, 2H), 7.32–7.36 (m, 2H), 7.63 (d, 1H), 7.70 (d, 1H) ppm.

**Figure S1.**  $^1\text{H}$  NMR spectrum of ET-PRBT in  $\text{CS}_2/\text{C}_6\text{D}_6$  (400 MHz).

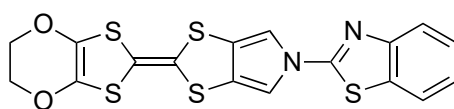

EO-PRBT

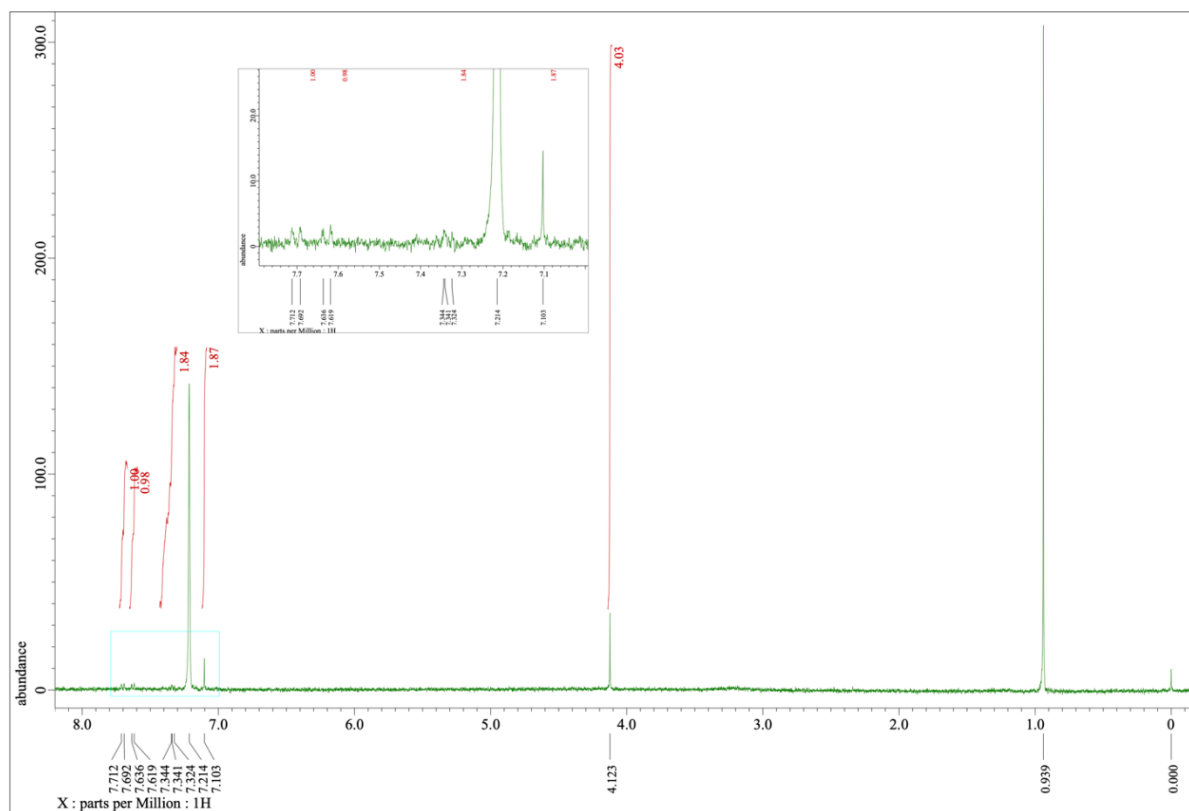

$^1\text{H}$  NMR (400 MHz,  $\text{CS}_2/\text{C}_6\text{D}_6$ , 25 °C, TMS)  $\delta$  4.12 (s, 4H), 7.10 (s, 2H), 7.32–7.34 (m, 2H), 7.63 (d, 1H), 7.70 (d, 1H) ppm.

**Figure S2.**  $^1\text{H}$  NMR spectrum of EO-PRBT in  $\text{CS}_2/\text{C}_6\text{D}_6$  (400 MHz).

## S2. Thin film XRD measurements

X-ray ( $\text{Cu K}\alpha$ ) structural analysis was performed on thin films of ET-PRBT and EO-PRBT, using a Rigaku SmartLab diffractometer. The results are shown in Fig. S1.

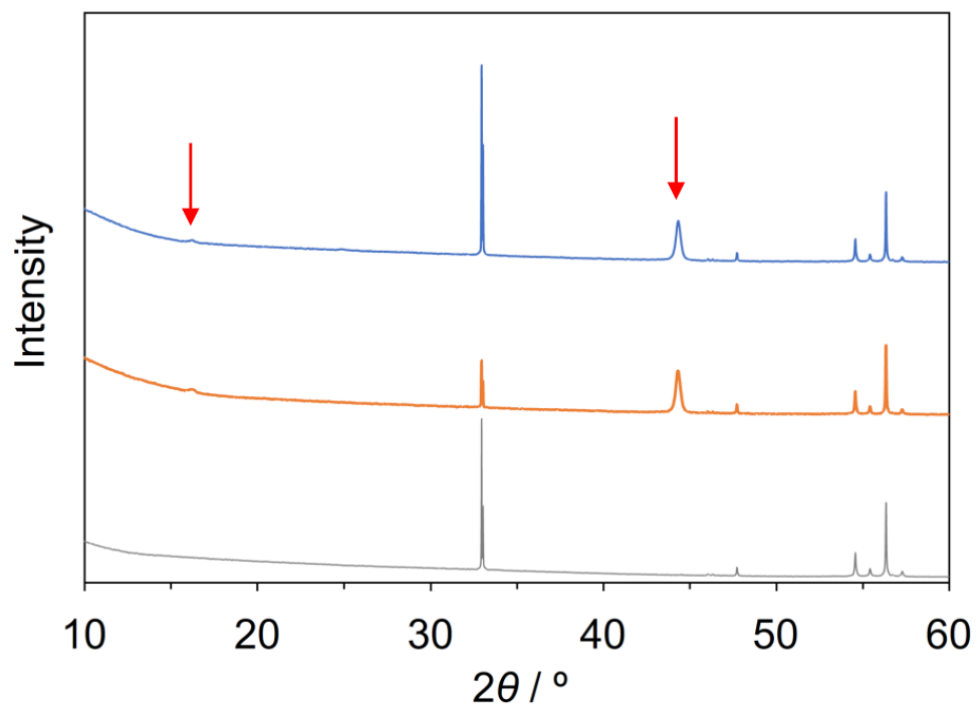

**Figure S3.** XRD patterns of the thin films (30 nm) of ET-PRBT (orange) and EO-PRBT (blue), together with Si substrate (gray). The intrinsic diffractions of ET-PRBT and EO-PRBT peaks appear at nearly the same positions,  $2\theta = 16^\circ$  and  $44^\circ$  (red arrows), indicating that they possess good crystallinity and are isostructural.

### S3. Details of PUND method and ferroelectric displacement current

The  $P-V$  curves in Fig. 6 are obtained by the procedure described in the caption of Fig. S2.

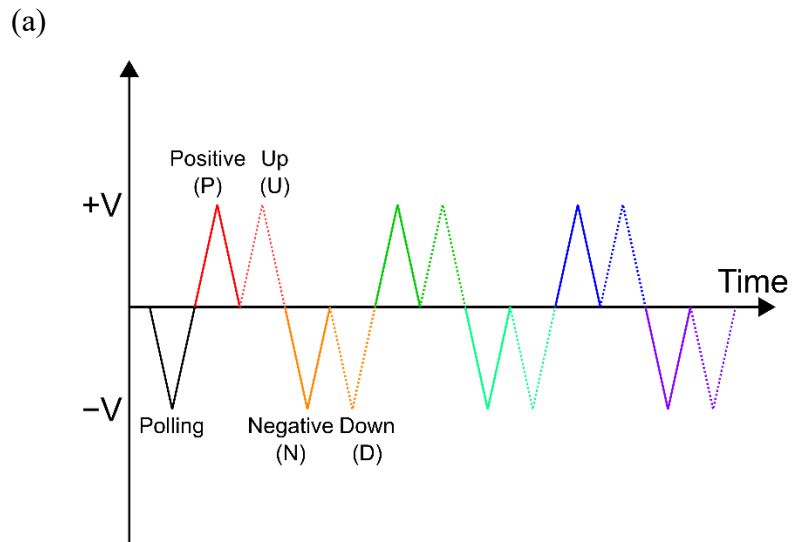

(b)

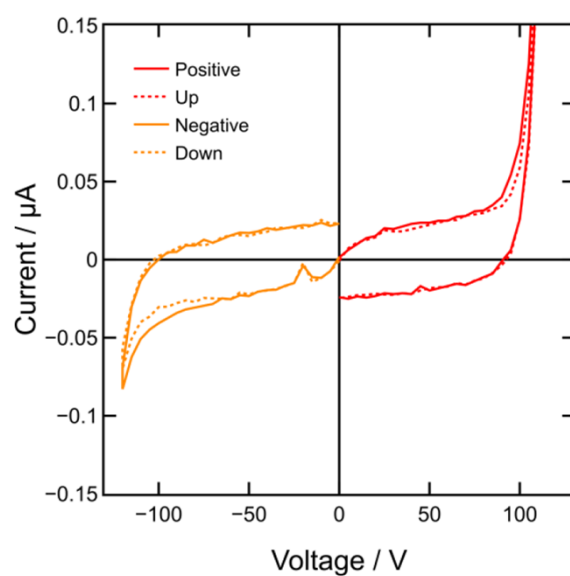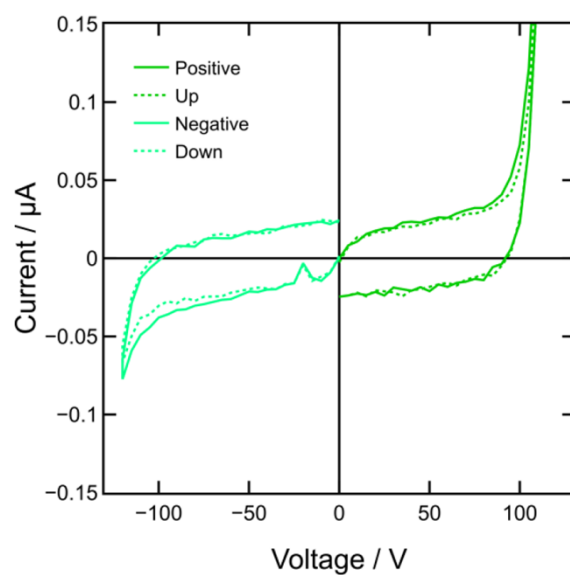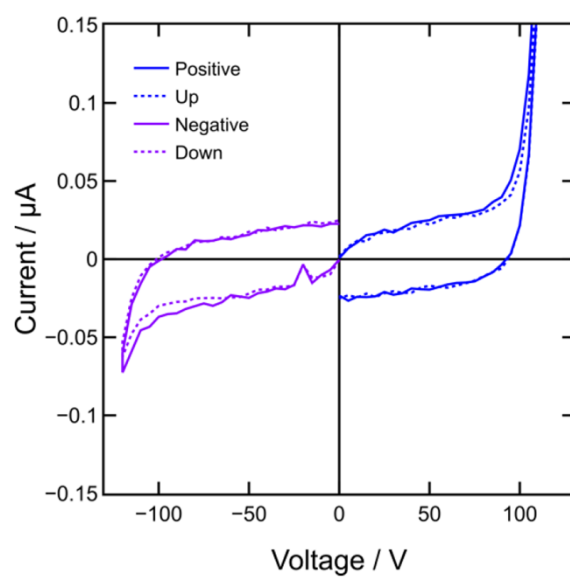

(c)

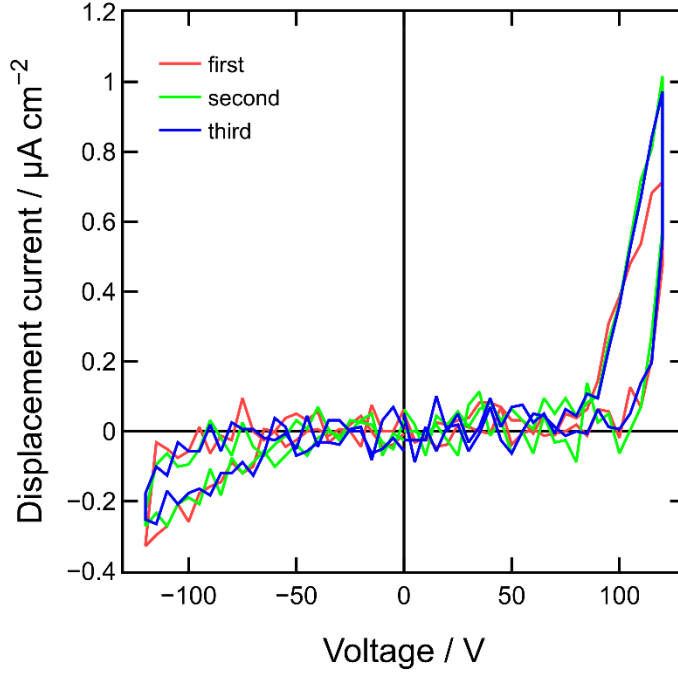

**Figure S4.** Details of the PUND method and ferroelectric displacement current: (a) Schematic diagram illustrating the voltage scan in the PUND method. (b) Current-voltage curves obtained in the P and N scans (solid curve) and in the U and D scans (dotted curves) on the PUND method. The same measurements were done for three times (upper, middle and bottom). (c) Difference in current between the P and U scans, as well as between the N and D scans, for the three scans. Polarization hysteresis is observed in the P and N scans, but they significantly contain a capacitive component. By subtracting the results of the U and D scans from the P and N scans, respectively, the pure ferroelectric component can be extracted. The  $P$ – $V$  curves in Figure 6 are obtained by integrating the curvatures shown in Fig. S2(c).
